# Supplementary material for: Epidemiologic analysis of respiratory viral infections among Singapore military servicemen in 2016
Source: Springer Nature journal article supplement (doi:10.1186/s12879-018-3040-x), 2018-03-12

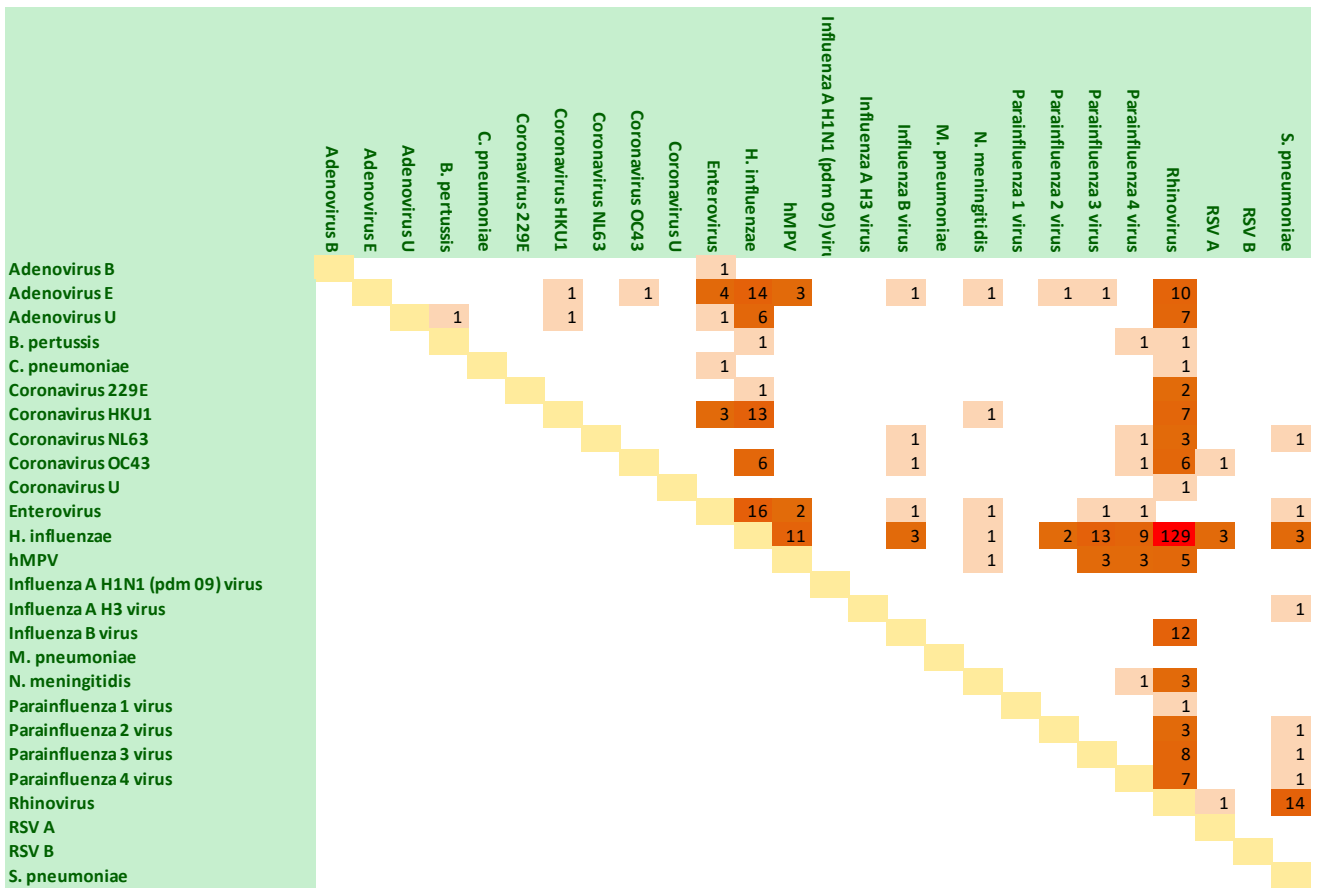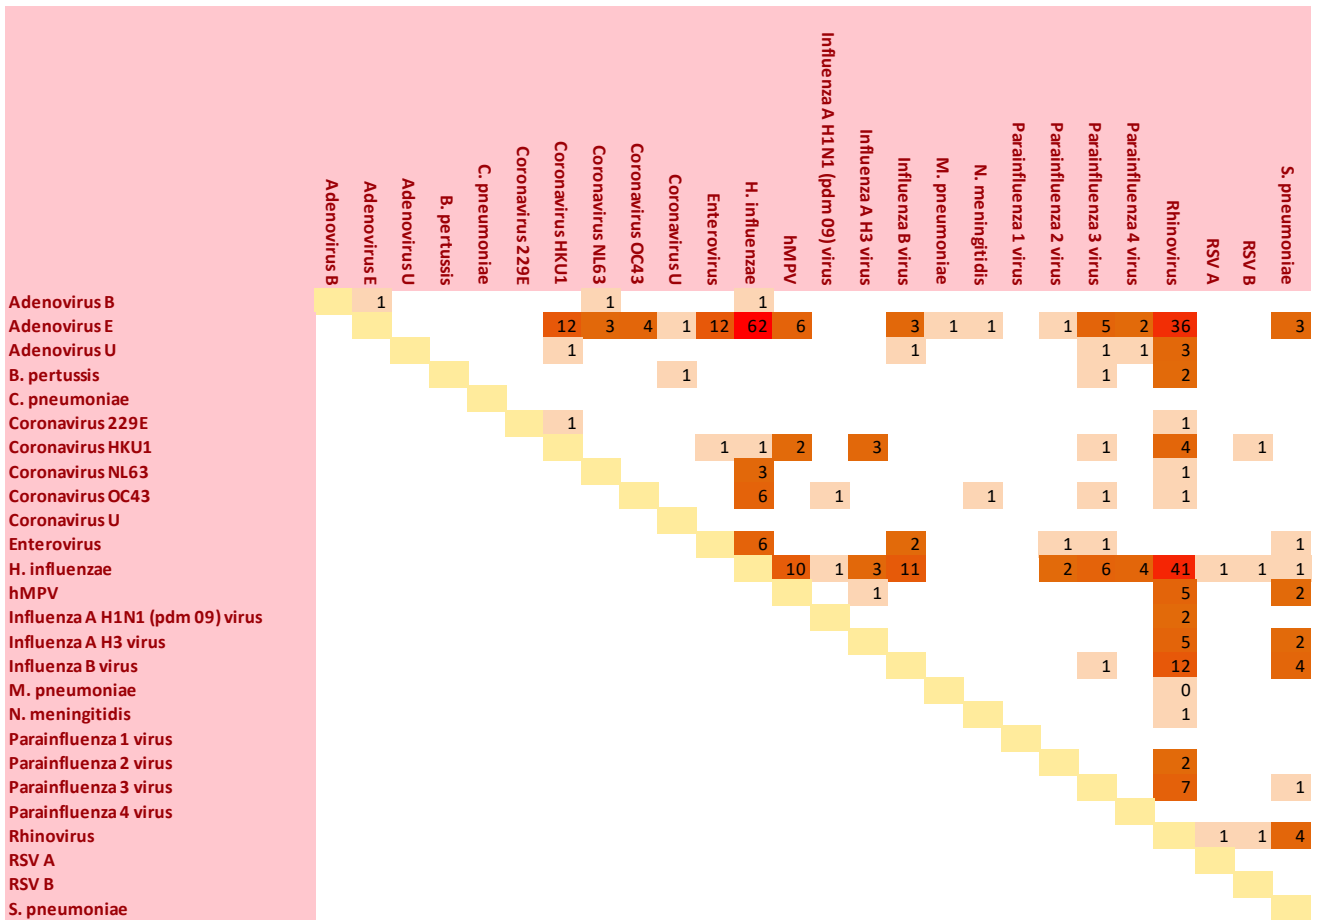

Supplement: MOESM1 [file 15527562]
