# Supplementary material for: Epidemiologic analysis of respiratory viral infections among Singapore military servicemen in 2016
Source: Springer Nature journal article supplement (doi:10.1186/s12879-018-3040-x), 2018-03-12
Supplement: MOESM2 [file 15527562]

| No | ARI samples with 4 pathogens detected                             |
|----|-------------------------------------------------------------------|
| 1  | Adenovirus E + Coronavirus HKU1 + H. influenzae + Parainfluenza 3 |
| 2  | Adenovirus E + Enterovirus + Influenza B + H. influenzae          |
| 3  | Adenovirus U + H. influenzae + Influenza B + Rhinovirus           |
| 4  | Bocavirus + Coronavirus OC43 + Enterovirus + H. influenzae        |
| 5  | H. influenzae + hMPV + Parainfluenza 2 + Rhinovirus               |
| 6  | Enterovirus + H. influenzae + Parainfluenza 3 + RSV A             |
| 7  | H. influenzae + Influenza B + Parainfluenza 4 + Rhinovirus        |
| 8  | hMPV + H. influenzae + Parainfluenza 3 + Rhinovirus               |
| 9  | hMPV + H. influenzae + Parainfluenza 4 + Rhinovirus               |
| 10 | H. influenzae + Influenza B + Rhinovirus + S. pneumoniae          |
| 11 | hMPV + Parainfluenza 4 + Rhinovirus + RSV B                       |

| No | ARI samples with 5 pathogens detected                                         |
|----|-------------------------------------------------------------------------------|
| 1  | Coronavirus HKU1 + H. influenzae + Influenza B + Parainfluenza 2 + Rhinovirus |

| No | FRI samples with 4 pathogens detected                                |
|----|----------------------------------------------------------------------|
| 1  | Adenovirus E + Coronavirus HKU1 + H. influenzae + Rhinovirus         |
| 2  | Adenovirus E + Coronavirus HKU1 + H. influenzae + hMPV               |
| 3  | Adenovirus E + Coronavirus OC43 + Enterovirus + H. influenzae        |
| 4  | Adenovirus E + Coronavirus OC43 + H. influenzae + Rhinovirus         |
| 5  | Adenovirus E + Enterovirus + H. influenzae + hMPV                    |
| 6  | Adenovirus E + H. influenzae + hMPV + Rhinovirus                     |
| 7  | Adenovirus E + H. influenzae + Rhinovirus + S. pneumoniae            |
| 8  | Adenovirus E + H. influenzae + hMPV + Parainfluenza 3                |
| 9  | B. pertussis + H. influenzae + hMPV + Influenza B                    |
| 10 | Coronavirus HKU1 + Parainfluenza 3 + Rhinovirus + S. pneumoniae      |
| 11 | Coronavirus OC43 + H. influenzae + Parainfluenza 3 + Rhinovirus      |
| 12 | Coronavirus OC43 + N. meningitidis + Parainfluenza 3 + S. pneumoniae |

| No | FRI samples with 5 pathogens detected                                          |
|----|--------------------------------------------------------------------------------|
| 1  | Adenovirus E + Coronavirus HKU1 + H. influenzae + Parainfluenza 3 + Rhinovirus |
| 2  | Adenovirus E + H. influenzae + N. meningitidis + Parainfluenza 4 + Rhinovirus  |
| 3  | Coronavirus OC43 + H. influenzae + Influenza B + Rhinovirus + S. pneumoniae    |

Supplementary Table 2
